# Supplementary material for: Stay in the loop: lessons learned about the microbial water quality in pipe loops transitioned from conventional to direct potable reuse water
Source: Royal Society of Chemistry journal article supplement (doi:10.1039/d2ew00858k), 2023-01-01
Supplement: d2ew00858k1.pdf [file d2ew00858k1.pdf]

## Stay in the loop: lessons learned from studying the microbiological impacts of blending advanced-treated wastewater in pipe loops

Lauren C. Kennedy<sup>1,2,3,\*\*</sup>, Scott E. Miller<sup>1,2,\*\*</sup>, Rose S. Kantor<sup>1,2</sup>, Hannah Greenwald<sup>1,2</sup>, Michael J. Adelman<sup>4</sup>, Hari Seshan<sup>5</sup>, Paige Russell<sup>6</sup>, Kara L. Nelson<sup>1,2\*</sup>

<sup>1</sup>Department of Civil and Environmental Engineering, College of Engineering, University of California, Berkeley, CA, United States

<sup>2</sup>National Science Foundation Engineering Research Center for Re-inventing the Nation's Urban Water Infrastructure, Berkeley, CA, United States

<sup>3</sup>Department of Civil and Environmental Engineering, College of Engineering, Stanford University, Stanford, CA, United States

<sup>4</sup>Stantec, Pasadena, CA, United States

<sup>5</sup>Tyr Group, Brisbane, Queensland, Australia

<sup>6</sup>Brown and Caldwell, San Diego, CA, United States

\*Corresponding author email: [karanelson@berkeley.edu](mailto:karanelson@berkeley.edu)

\*\* Authors contributed equally to the work

|                                          |    |
|------------------------------------------|----|
| Supplementary Methods                    | 1  |
| Pipe loop rig design and start-up        | 1  |
| Short-term pipe loop operation protocols | 2  |
| Flow Cytometry                           | 3  |
| Biofilm Collection and Sampling          | 3  |
| qPCR Methods                             | 4  |
| Supplementary Tables                     | 5  |
| Supplementary Figures                    | 20 |
| References                               | 30 |

## Supplementary Methods

### Pipe loop rig design and start-up

The total water volume in each pipe loop was ~100 liters; this volume was selected to ensure sufficient microbial biomass could be concentrated from each pipe loop for genomic analyses; therefore, the 113-liter reservoir volume was selected based on this constraint. The pipe materials were chosen to be characteristic of the full-scale distribution system and premise plumbing, where the most common pipe categories are (in order of total length): cementitious, ferrous, plastic, copper, and brass. The pipe segments of copper, galvanized iron, leaded brass, and cement-lined ductile iron were each 7.6-cm in diameter and 1.5-m in length; the 12 removable PVC segments were each 2.5-cm in diameter and 0.3-m in length. The remaining PVC piping was 7.6-cm in diameter. Water was recirculated through the reservoir and piping at a flow rate of  $5.05 \times 10^{-4} \text{ m}^3/\text{s}$ . This flow rate was chosen to target a fluid shear force of  $\sim 0.25 \text{ N/m}^2$  on the inner surfaces of the 0.3-m length removable pipe PVC segments for biofilm sampling. Fluid shear is the relevant scaling parameter with respect to biofilms and precipitates on piping surfaces, and an inner wall shear force of  $0.25 \text{ N/m}^2$  is commonly described as characteristic of drinking water distribution systems.<sup>1</sup> However, the range in pipe diameters combined with the flow rate corresponds to a pipe wall shear stress ranging from 0.005 to  $0.25 \text{ N/m}^2$  throughout the system. The total length of pipe was selected to ensure a sufficient fraction of the hydraulic residence time of the system was in the pipe loop itself as opposed to the reservoir. The design achieves this with a residence time of 1.9 minutes in the loop compared to 1.8 minutes in the reservoir while the water was recirculating. After the five pipe loops were constructed, two preparatory steps were carried out prior to initiation of the first study phase: (1) disinfection by high concentrations of free chlorine, and (2) inoculation with a drinking water microbial community collected from the full-scale conventional distribution system.

After construction, each pipe loop was disinfected prior to inoculation. Disinfection was carried out on October 16, 2017 by recirculating 100 liters of drinking water from a conventional drinking water treatment plant dosed to  $\sim 100 \text{ mg/L}$  of free chlorine for 3 hours. Pipe loops were then drained and filled four times with 100 liters of drinking water from this source to diminish excess chlorine residual.

After disinfection, each pipe loop was inoculated with organisms concentrated from the full-scale drinking water distribution system. This inoculum was collected by dead-end ultrafiltration of drinking water from three public taps in the drinking water distribution system served by the conventional drinking water treatment facility over a 23-hour period. Prior to setting up the ultrafilters, the taps were flushed at max flow rate for  $\sim 10$  minutes. In total, 6,070 L of tap water was concentrated by the three ultrafilters. Ultrafilters were backflushed into separate sterile bottles and the samples were held in the fridge for  $\sim 10$  days before inoculation of the pipe loops. On the first day of pipe loop operation (October 16, 2017) the three bottles of inoculum were transported on ice to the pipe loop site, then homogenized by combining each bottle into a single sterile bottle and shaking vigorously for 10 s. Conventional drinking water was added to each of the pipe loops, and the inoculum was poured in equal volumes into each of the five pipe

loop reservoirs. The pipe loop pumps were turned on and run under standard operating conditions for seven days (recirculating the same water). Thereafter, the first day of Phase 1 operations began.

### Short-term pipe loop operation protocols

There were two short-term protocols tested in Phase 1 that deviated from standard operations that were used in an attempt to stimulate biological growth. First, a 7-day recirculation period was employed for recirculation periods ending on November 13, 20, and 27, 2017. Second, for recirculation periods ending in early December, the total chlorine residual in the conventional feed water was intentionally decayed prior to recirculation by storing conventional feed water for 3.5 days.

In Phase 1, we attempted to lower the starting chlorine concentration in the conventional feedwater by intentionally degrading the residual in a small storage reservoir on-site. For recirculation periods ending on November 30 and December 4, 7, and 11, 2017, conventional feedwater was stored in the reservoir for ~3.5 days. Stored conventional feedwater was then chlorinated as per the procedure for the advanced feedwater. Thereafter, the intentional degradation of the chlorine residual was discontinued beginning on December 11, 2017.

### Flow Cytometry

Two flow cytometers were used in this study as described in detail previously.<sup>2</sup> The Accuri was equipped with a 50 mW laser emitting a fixed wavelength of 488 nm, and measurements were performed at the “fast” flow rate of 66  $\mu\text{L minute}^{-1}$  on sample volumes of 50  $\mu\text{L}$ . Microbial cell signals were distinguished and enumerated from background and instrument noise on density plots of green (FL1; 533  $\pm$  30 nm) and red (FL3; >670 nm) fluorescence using FlowJo gating software (v10.5.3). Gate positions were modified slightly from a template publicly available for the BD Accuri C6<sup>3</sup> to adapt for FlowJo software. The Canto was equipped with a 20 mW laser emitting a fixed wavelength of 488 nm, and measurements were performed at a flow rate of 1  $\mu\text{L s}^{-1}$  for 50 seconds. Microbial cell signals were distinguished and enumerated from background and instrument noise on density plots of green (FTIC; 530  $\pm$  30 nm) and red (PerCP; 695  $\pm$  40 nm) fluorescence using FlowJo gating software. Gate positions were modified slightly compared to BD Accuri C6 gating based on calibration beads (Spherotech, Catalog # NFPPS-52-4K, Lake Forest, IL).

### Biofilm Collection and Sampling

In a study of four methods for biofilm sampling from the interior surfaces of water pipes, Widmer and Jellison<sup>4</sup> reported the highest efficiencies in cell removal for scraping and sonication, and we combined both methods of biofilm recovery. Each end of a PVC segment for pipe loop biofilm recovery underwent a three-minute sonication with ~100 mL of 0.22  $\mu\text{m}$  pore size-filtered water from the corresponding pipe loop. Next, the pipe segment was thoroughly scraped with a sterile cell scraper internally (catalog #RPI-162423CS; Research Products International, Mt. Prospect, IL), filled with 20 mL of filtered pipe loop bulk water, and shaken vigorously for 15 seconds. The cell scraper

was placed inside the shaken filtered pipe loop bulk water, and sonicated for 30 seconds. Sonicate from each step was combined to produce ~220 mL.

One pipe biofilm field blank was collected on January 18, 2018. The blank consisted of 225 mL of water from a pipe loop recirculating conventional drinking water that was filtered (0.22 µm) into a sterile bottle. The bottle was kept open during field sampling and underwent the laboratory sonication procedure. Finally, the water was concentrated using polyethylene glycol flocculation in parallel with field biofilm samples.

### qPCR Methods

Amplification and quantification of qPCR targets were carried out in technical triplicate in MicroAmp™ Fast Optical 96-well optical plates (catalog #4346906, ThermoFisher Scientific) on a StepOnePlus™ Real-Time PCR System (software v2.3; Applied Biosystems, Foster City, CA). DNA standard curves on every plate consisted of 10-fold serial dilutions of gBlocks Gene Fragments (Integrated DNA Technologies, Coralville, IA) ranging from 10 to 10<sup>9</sup> gene copies, depending on assay, using PCR-grade water (catalog #AAJ60610-EQC, VWR, ThermoFisher Scientific) in DNA LoBind® 0.5 mL (catalog #22431005, Eppendorf®, Millipore Sigma) or 5 mL tubes (catalog #Z768820-200EA, Sigma Aldrich) (Table S5). Triplicate negative controls (i.e., PCR-grade water) were run on every plate. gBlock™ standards were prepared as follows: probes were prepared as 100 nm PrimeTime 5' 6-FAM/ZEN/3' IBFQ (16S rRNA) or PrimeTime Eco 5' 6-FAM/ZEN/3' IBFQ (*Legionella pneumophila*) purified by HPLC. Primers for all assays were prepared as gBlocks™ Gene Fragments, RxnReady® Primer Pool – Oligo Mix Products purified by standard desalting. On the StepOnePlus software, we applied the same threshold to all samples within an assay. The threshold was selected based on average threshold values determined by the instrument and checked visually to best cross the linear portions of every standard and sample amplification curve. Table S5 shows the thresholds chosen for each assay.

Data analysis of qPCR results was completed in R (v4.1.3). The limit of quantification (LoQ) for each assay was experimentally determined as the lowest concentration on each standard curve that was at least three standard deviations higher than the mean concentration of the negative control and for which at least 75% of triplicates amplified. The LoQs were determined to be 1,000 gene copies per reaction for the 16S rRNA gene and 10 genes copies per PCR reaction for all other qPCR assays. The negative controls for the 16S rRNA gene amplified but below the LoQ (i.e., not within the linear region of the standard curves). Negative controls and field blanks for all other assays did not amplify.

Thermal cycling conditions for each assay were based on previous studies (Table S9) and optimized before analysis of any samples. Melt curves (SYBR Green™ chemistry assays) were used to evaluate non-target amplification and confirm amplification of target DNA (results not shown). Inhibition testing of samples (Table S10) followed the spike and dilute method to determine possible inhibition of qPCR assays by interfering substances in the water samples and subsequent need for sample dilution.<sup>5</sup> Based on

inhibition testing results, sample DNA was diluted as necessary to ensure <100 ng of DNA was added to each well.

Reactions (total volume: 20  $\mu$ L) were performed manually in triplicate with purified sample DNA (5  $\mu$ L) and reaction mix (15  $\mu$ L). Assays utilized either TaqMan<sup>™</sup> Environmental Master Mix 2.0 chemistry (catalog #4396838, ThermoFisher Scientific) or PowerUp<sup>™</sup> SYBR<sup>™</sup> Green Master Mix (catalog #A25780, ThermoFisher Scientific). Each reaction mix (Table S9) consisted of master mix (10  $\mu$ L), bovine serum albumen to minimize potential inhibition (0.3  $\mu$ M; catalog #15260037, ThermoFisher Scientific), primers and probes (Table S8), and nuclease-free water to yield 15  $\mu$ L. To determine if samples were inhibited for PCR, a subset of samples was selected for PCR inhibition testing. No samples were inhibited (Table S10); therefore, no dilution was used for some samples. However, sample DNA was diluted as necessary to retain sufficient sample DNA to complete all intended analyses (e.g., multiple qPCR assays and genomic sequencing) and to ensure less than 100 ng of DNA was added to each qPCR plate well. Sample dilutions varied from no dilution to 100-fold dilution. Of the 242 samples analyzed among all of the qPCR assays, one sample was diluted 100-fold, four samples were diluted 20-fold, and 16 samples were diluted 10-fold; all other samples were diluted 5-fold or less.

## Supplementary Tables

**Table S1:** Summary of physical and chemical water quality analyses applied to feed waters and pipe loops.

| Parameter                                                                                                                                                                                          | Frequency of Sampling | Location of Analysis | Analytical Method                            | Method Reference                                                     |
|----------------------------------------------------------------------------------------------------------------------------------------------------------------------------------------------------|-----------------------|----------------------|----------------------------------------------|----------------------------------------------------------------------|
| pH                                                                                                                                                                                                 | Daily                 | Field                | pH probe                                     | SM 4500-H <sup>+</sup>                                               |
| Temperature                                                                                                                                                                                        | Daily                 | Field                | Thermometer                                  |                                                                      |
| Total Chlorine                                                                                                                                                                                     | Daily                 | Field                | Spectrophotometric                           | SM 4500-Cl G                                                         |
| Free Chlorine                                                                                                                                                                                      | Twice Weekly          | Field                | Spectrophotometric                           | SM 4500-Cl G                                                         |
| Alkalinity                                                                                                                                                                                         | Weekly                | Lab                  |                                              | SM 2320 B 1997                                                       |
| Major Anions <sup>2-</sup> :<br>Cl <sup>-</sup> , SO <sub>4</sub> <sup>2-</sup> , F <sup>-</sup> ,<br>NO <sub>3</sub> <sup>-</sup> , CO <sub>3</sub> <sup>2-</sup> , PO <sub>4</sub> <sup>3-</sup> | Weekly                | Lab                  | Ion Chromatography                           | EPA 300.0;<br>SM 2320 B 1997<br>(CO <sub>3</sub> <sup>2-</sup> only) |
| Major Cations:<br>Ca <sup>2+</sup> , Mg <sup>2+</sup> ,<br>Na <sup>+</sup> , K <sup>+</sup>                                                                                                        | Weekly                | Lab                  | Atomic Absorption Spectrometry               | SM 3111 B 1999                                                       |
| Metals: Lead and Copper                                                                                                                                                                            | Weekly                | Lab                  | Inductively Coupled Plasma Mass Spectrometry | EPA 200.8                                                            |

**Table S2:** Microbial assays completed for bulk water and biofilm samples.

| Target Group                      | Parameter / Target                       | Bulk Water | Bio-film | Description and Rationale                                                                                                                                                                                                                                                         |
|-----------------------------------|------------------------------------------|------------|----------|-----------------------------------------------------------------------------------------------------------------------------------------------------------------------------------------------------------------------------------------------------------------------------------|
| Microbial Abundance and Viability | Total cell count by flow cytometry       | X          |          | Quantify microbial cells <sup>6,7</sup>                                                                                                                                                                                                                                           |
|                                   | Intact cell count by flow cytometry      | X          |          | Quantify microbial cells with intact membranes <sup>7,8</sup>                                                                                                                                                                                                                     |
|                                   | Total ATP                                | X          | X        | Quantify microbial biomass and assess microbial viability <sup>8</sup>                                                                                                                                                                                                            |
|                                   | Intracellular ATP (or microbial ATP)     | X          | X        |                                                                                                                                                                                                                                                                                   |
|                                   | 16S rRNA Gene                            | X          | X        | Quantify bacteria (16S rRNA gene) <sup>9</sup> ; Calculate relative abundance for other targets ( <i>bla</i> <sub>TEM</sub> and <i>sul</i> 1)                                                                                                                                     |
| Opportunistic pathogens           | <i>Legionella pneumophila</i>            | X          | X        | Quantify opportunistic pathogens that are the leading causes of drinking water-related illness in the USA; frequently detected in biofilm and bulk water of drinking water distribution systems <sup>10</sup>                                                                     |
|                                   | <i>Mycobacterium avium</i> Complex (MAC) | X          | X        |                                                                                                                                                                                                                                                                                   |
|                                   | <i>Acanthamoeba</i> spp.                 | X          | X        | Quantify free-living parasitic amoeba; host for <i>L. pneumophila</i> and MAC <sup>11</sup>                                                                                                                                                                                       |
| Antibiotic resistance genes       | <i>bla</i> <sub>TEM</sub>                | X          | X        | Quantify emerging microbial contaminants with potential public health impacts. <sup>12</sup> <i>Bla</i> <sub>TEM</sub> <sup>13</sup> and <i>sul</i> 1 <sup>14</sup> frequently detected in wastewater and are proposed indicators for antibiotic resistance in wastewater systems |
|                                   | <i>sul</i> 1                             | X          | X        |                                                                                                                                                                                                                                                                                   |
| Microbial Community Profile       | 16S rRNA gene (V4 region)                | X          | X        | Examine changes in microbial community profile <sup>15,16</sup> and identify targets to quantify with qPCR                                                                                                                                                                        |

**Table S3:** Total chlorine data for pipe loops at the end of recirculation periods in Phases 1 and 2, where n is the total number of samples for which total chlorine concentrations were determined.

| Pipe loop | Phase   | n  | Average total chlorine concentration (mg/L as Cl <sub>2</sub> ) | Samples < 0.02 mg/L as Cl <sub>2</sub> (%) | Samples < 0.2 mg/L as Cl <sub>2</sub> (%) |
|-----------|---------|----|-----------------------------------------------------------------|--------------------------------------------|-------------------------------------------|
| Loop 1    | Phase 1 | 18 | 0.096                                                           | 16.7                                       | 83.3                                      |
| Loop 1    | Phase 2 | 22 | 0.11                                                            | 9.09                                       | 86.4                                      |
| Loop 2    | Phase 1 | 18 | 0.26                                                            | 5.56                                       | 44.4                                      |
| Loop 2    | Phase 2 | 22 | 0.20                                                            | 4.55                                       | 68.2                                      |
| Loop 3    | Phase 1 | 18 | 0.56                                                            | 0                                          | 5.56                                      |
| Loop 3    | Phase 2 | 22 | 0.18                                                            | 0                                          | 68.2                                      |
| Loop 4    | Phase 1 | 18 | 0.50                                                            | 0                                          | 22.2                                      |
| Loop 4    | Phase 2 | 22 | 0.21                                                            | 0                                          | 63.6                                      |
| Loop 5    | Phase 1 | 18 | 0.26                                                            | 0                                          | 50                                        |
| Loop 5    | Phase 2 | 22 | 0.79                                                            | 0                                          | 0                                         |



**Table S4:** Physical and chemical water quality results from the pipe loops and feed waters. Mean values by phase (Phases 1 and 2) are shown. Alk = alkalinity. When data were not collected, the box is marked as “NC”.

| Phase | Sample Type                                     | Temp | pH  | Alk                             | Ca <sup>2+</sup> | Cu <sup>2+</sup> | Mg <sup>2+</sup> | Pb <sup>2+</sup> | NO <sub>3</sub> -N <sup>-</sup> | PO <sub>4</sub> <sup>3-</sup> | SO <sub>4</sub> <sup>2-</sup> | Cl <sup>-</sup> | F <sup>-</sup> | K <sup>+</sup> | Na <sup>+</sup> |
|-------|-------------------------------------------------|------|-----|---------------------------------|------------------|------------------|------------------|------------------|---------------------------------|-------------------------------|-------------------------------|-----------------|----------------|----------------|-----------------|
|       | <i>units</i>                                    | °C   | -   | mg/L<br>as<br>CaCO <sub>3</sub> | mg/L             | µg/L             | mg/L             | µg/L             | mg/L                            | mg/L                          | mg/L                          | mg/L            | mg/L           | mg/L           | mg/L            |
| 1     | Conventional feedwater                          | NC   | NC  | NC                              | NC               | NC               | NC               | NC               | NC                              | NC                            | NC                            | NC              | NC             | NC             | NC              |
| 1     | Advanced feedwater                              | NC   | NC  | NC                              | NC               | NC               | NC               | NC               | NC                              | NC                            | NC                            | NC              | NC             | NC             | NC              |
| 1     | Pipe loops fed with 100% conventional feedwater | 18   | 8.3 | 93                              | 39               | 15               | 15               | 4.19             | 0.31                            | <0.05                         | 87                            | 73              | 0.53           | 4.86           | 59              |
| 1     | Pipe loops fed with the advanced blend          | 18   | 8.6 | 100                             | 32               | 38               | 5                | 8.24             | 1.93                            | <0.05                         | 23                            | 32              | 0.14           | 3.35           | 35              |
| 2     | Conventional feedwater                          | 16   | 8.1 | 85                              | 33               | 7                | 15               | <0.3             | 0.34                            | <0.05                         | 88                            | 76              | 0.53           | 3.08           | 62              |
| 2     | Advanced feedwater                              | 17   | 8.1 | 101                             | 38               | 2                | 4                | <0.3             | 1.58                            | 0.22                          | 12                            | 24              | <0.05          | 1.55           | 33              |
| 2     | Pipe loops fed with 100% conventional feedwater | 15   | 8.3 | 86                              | 34               | 31               | 14               | 5.8              | 0.3                             | 0.05                          | 80                            | 73              | 0.52           | 3.42           | 76              |
| 2     | Pipe loops fed with the advanced blend          | 15   | 8.4 | 92                              | 34               | 122              | 5                | 10.0             | 1.68                            | 0.06                          | 25                            | 33              | 0.15           | 1.99           | 32              |

**Table S5:** Summary statistics for qPCR standard curves, including amplification efficiency,  $R^2$ , and number of replicates that amplified for the lowest quantity of the qPCR standard curves.

|                                                                                                                    | 16S rRNA Gene | <i>Legionella pneumophila</i> | <i>Mycobacterium avium</i> complex | <i>Acanthamoeba</i> spp. | <i>bla<sub>TEM</sub></i> | <i>sul1</i>   |
|--------------------------------------------------------------------------------------------------------------------|---------------|-------------------------------|------------------------------------|--------------------------|--------------------------|---------------|
| # of Standard Curves                                                                                               | 10            | 5                             | 6                                  | 5                        | 7                        | 6             |
| Threshold applied                                                                                                  | 0.14          | 1                             | 0.25                               | 0.23                     | 0.4                      | 0.4           |
| Linear range (gene copies per qPCR well)                                                                           | $10^3 - 10^9$ | $10^1 - 10^7$                 | $10^1 - 10^6$                      | $10^1 - 10^6$            | $10^1 - 10^6$            | $10^1 - 10^6$ |
| <b>Amplification Efficiency</b>                                                                                    |               |                               |                                    |                          |                          |               |
| Arithmetic mean                                                                                                    | 84.4          | 93.2                          | 83.3                               | 85.2                     | 81.2                     | 83.8          |
| Standard deviation                                                                                                 | 7.0           | 3.8                           | 6.2                                | 3.7                      | 3.9                      | 6.6           |
| Maximum                                                                                                            | 93.6          | 98.1                          | 89.6                               | 90.3                     | 87.7                     | 92.7          |
| Minimum                                                                                                            | 73.3          | 88.4                          | 76.2                               | 80.0                     | 77.3                     | 73.9          |
| <b>R<sup>2</sup> Values</b>                                                                                        |               |                               |                                    |                          |                          |               |
| Mean                                                                                                               | 0.996         | 0.998                         | 0.998                              | 0.993                    | 0.998                    | 0.998         |
| St. Dev.                                                                                                           | 0.004         | 0.001                         | 0.001                              | 0.002                    | 0.001                    | 0.001         |
| <b># of Replicates Amplifying at Low End of Curve (i.e., 1,000 copies for 16S, 10 copies for all other assays)</b> |               |                               |                                    |                          |                          |               |
| Arithmetic mean                                                                                                    | 3             | 3                             | 2.3                                | 2.3                      | 2.4                      | 2.7           |
| Minimum                                                                                                            | 3             | 3                             | 1                                  | 1                        | 2                        | 2             |
| Maximum                                                                                                            | 3             | 3                             | 3                                  | 3                        | 3                        | 3             |
| % of All Replicates that Amplified                                                                                 | 100           | 100                           | 78                                 | 78                       | 81                       | 89            |

**Table S6:** qPCR standard curve information for each plate. Each plate had one standard curve run on it with three replicates at each 10-fold dilution step of the standard curve. None of the qPCR negative controls for 16S rRNA gene amplified within the linear range of the standard curve. \*LoQ = limit of quantification as defined in the main manuscript methods. \*\*qPCR negative controls were PCR-grade water as defined in the methods. \*\*\*Standard was accidentally not added to the 1,000 gene copy wells (the LoQ) for the 16S rRNA gene standard curve on 3/9/19 and a master standard curve of all other 16S standard curves was used to convert C<sub>q</sub> to quantities. *Mycobacterium avium* complex is abbreviated as “MAC.”

| Plate # | Date Run | Assay         | Efficiency | Slope  | Y-intercept | R <sup>2</sup> | Number of Standard Curve Replicates that Amplified at the LoQ* | Number of qPCR Negative Control** Replicates that Amplified | Avg C <sub>q</sub> at LoQ | Standard Deviation of C <sub>q</sub> at LoQ |
|---------|----------|---------------|------------|--------|-------------|----------------|----------------------------------------------------------------|-------------------------------------------------------------|---------------------------|---------------------------------------------|
| 101     | 2/9/19   | acantha-moeba | 82.04      | -3.844 | 41.797      | 0.994          | 2                                                              | 0                                                           | 37.46                     | 0.80                                        |
| 103     | 2/9/19   | MAC           | 87.94      | -3.649 | 41.063      | 0.998          | 3                                                              | 0                                                           | 37.21                     | 0.41                                        |
| 104     | 2/9/19   | legionella    | 94.77      | -3.454 | 41.716      | 0.999          | 3                                                              | 0                                                           | 38.46                     | 0.34                                        |
| 105     | 2/9/19   | blatem        | 87.65      | -3.658 | 40.425      | 0.999          | 3                                                              | 0                                                           | 36.78                     | 0.25                                        |
| 106     | 2/18/19  | sul1          | 92.65      | -3.511 | 40.214      | 0.998          | 3                                                              | 0                                                           | 36.75                     | 0.57                                        |
| 107     | 2/18/19  | S16           | 91.05      | -3.557 | 41.728      | 0.999          | 3                                                              | 3                                                           | 31.22                     | 0.06                                        |
| 108     | 2/18/19  | S16           | 84.9       | -3.746 | 42.534      | 0.998          | 3                                                              | 3                                                           | 31.30                     | 0.26                                        |
| 109     | 2/18/19  | acantha-moeba | 90.34      | -3.577 | 39.921      | 0.992          | 3                                                              | 0                                                           | 36.53                     | 1.17                                        |
| 111     | 2/20/19  | MAC           | 76.23      | -4.064 | 42.952      | 0.997          | 1                                                              | 0                                                           | 38.58                     | NA                                          |
| 112     | 2/21/19  | legionella    | 98.09      | -3.369 | 41.259      | 0.998          | 3                                                              | 0                                                           | 38.08                     | 0.85                                        |
| 113     | 2/21/19  | sul1          | 87.13      | -3.674 | 40.727      | 0.998          | 3                                                              | 0                                                           | 37.33                     | 0.68                                        |
| 114     | 2/21/19  | blatem        | 77.36      | -4.018 | 42.848      | 0.998          | 2                                                              | 0                                                           | 38.39                     | 0.46                                        |
| 115     | 2/24/19  | S16           | 88.33      | -3.637 | 41.518      | 0.998          | 3                                                              | 3                                                           | 30.69                     | 0.08                                        |
| 116     | 2/24/19  | acantha-moeba | 85.23      | -3.736 | 40.229      | 0.992          | 3                                                              | 0                                                           | 36.81                     | 1.08                                        |
| 118     | 2/24/19  | MAC           | 88.95      | -3.619 | 40.077      | 0.999          | 3                                                              | 0                                                           | 36.41                     | 0.37                                        |
| 119     | 2/24/19  | legionella    | 94.25      | -3.468 | 41.5        | 0.999          | 3                                                              | 0                                                           | 38.15                     | 0.40                                        |

|     |         |               |        |        |        |       |   |   |       |      |
|-----|---------|---------------|--------|--------|--------|-------|---|---|-------|------|
| 120 | 2/26/19 | sul1          | 82.47  | -3.829 | 42.021 | 1     | 2 | 0 | 37.96 | 0.10 |
| 121 | 2/26/19 | blatem        | 79.6   | -3.932 | 42.741 | 0.998 | 2 | 0 | 38.32 | 0.74 |
| 122 | 2/26/19 | S16           | 78.48  | -3.975 | 44.065 | 0.996 | 3 | 3 | 32.85 | 0.16 |
| 123 | 2/26/19 | acantha-moeba | 86.91  | -3.681 | 40.776 | 0.992 | 2 | 0 | 36.58 | 1.24 |
| 124 | 2/26/19 | MAC           | 77.98  | -3.994 | 42.511 | 0.997 | 2 | 0 | 37.87 | 0.61 |
| 125 | 2/27/19 | sul1          | 77.06  | -4.03  | 42.92  | 0.998 | 2 | 0 | 39.17 | 1.18 |
| 126 | 3/5/19  | blatem        | 80.49  | -3.899 | 42.048 | 0.996 | 3 | 0 | 37.94 | 1.04 |
| 127 | 3/5/19  | legionella    | 90.36  | -3.577 | 42.504 | 0.999 | 3 | 0 | 38.83 | 0.58 |
| 128 | 3/6/19  | legionella    | 88.4   | -3.635 | 42.752 | 0.997 | 3 | 0 | 39.25 | 1.12 |
| 129 | 3/9/19  | 16S           | 78     | -3.994 | 44.807 | 0.992 | 3 | 3 | ***   | ***  |
| 130 | 3/7/19  | sul1          | 88.49  | -3.632 | 39.872 | 0.999 | 3 | 0 | 36.05 | 0.22 |
| 131 | 3/7/19  | blatem        | 80.8   | -3.889 | 41.534 | 0.997 | 3 | 0 | 38.12 | 0.67 |
| 132 | 3/12/19 | acantha-moeba | 86.94  | -3.681 | 40.256 | 0.997 | 3 | 0 | 36.92 | 0.28 |
| 134 | 3/9/19  | MAC           | 89.6   | -3.599 | 40.465 | 0.997 | 3 | 0 | 36.87 | 0.80 |
| 136 | 3/12/19 | MAC           | 78.85  | -3.96  | 42.177 | 0.998 | 2 | 0 | 38.12 | 0.46 |
| 137 | 3/20/19 | S16           | 77.72  | -3.979 | 45.24  | 0.994 | 3 | 3 | 33.74 | 0.06 |
| 138 | 3/12/19 | blatem        | 85.198 | -3.736 | 41.7   | 0.997 | 2 | 0 | 37.44 | 0.35 |
| 139 | 3/19/19 | sul1          | 85.034 | -3.742 | 40.899 | 0.997 | 3 | 0 | 37.44 | 0.97 |
| 140 | 3/19/19 | S16           | 93.555 | -3.487 | 41.638 | 0.997 | 3 | 3 | 31.38 | 0.09 |
| 144 | 3/26/19 | blatem        | 77.3   | -4.02  | 43.184 | 0.998 | 2 | 0 | 39.16 | 1.33 |
| 145 | 3/27/19 | S16           | 90.623 | -3.569 | 43.611 | 0.987 | 3 | 3 | 33.17 | 0.41 |
| 148 | 3/28/19 | S16           | 73.276 | -4.189 | 51.799 | 0.996 | 3 | 3 | 39.21 | 0.63 |
| 151 | 7/1/19  | S16           | 87.648 | -3.658 | 42.556 | 1     | 3 | 3 | 31.68 | 0.08 |

**Table S7: Summary table of gBlocks™ standards.**

|                                                   | <b>Standard A</b>                     | <b>Standard B</b>                                    | <b>Standard C</b>  |
|---------------------------------------------------|---------------------------------------|------------------------------------------------------|--------------------|
| <b>Includes F and R Primers for what Targets?</b> | 16S rRNA Gene, Legionella pneumophila | Acanthamoeba spp., sul1, Mycobacterium avium complex | bla <sub>tem</sub> |
| <b>Length</b>                                     | 740                                   | 997                                                  | 748                |
| <b>Melting temp (degrees Celsius)</b>             | 80.6                                  | 80.4                                                 | 78.1               |
| <b>GC Content</b>                                 | 0.5243                                | 0.5145                                               | 0.4626             |
| <b>Pass IDT complexity screening?</b>             | yes                                   | yes                                                  | yes                |
| <b>Primer sequences in standard verified?</b>     | yes                                   | yes                                                  | yes                |

**Table S8:** Forward (F) and reverse (R) primers and probe sequences for qPCR assays.

| Gene Target                               | Primer or Probe | Target Name    | Target Sequence (5' --> 3')        | Ref |
|-------------------------------------------|-----------------|----------------|------------------------------------|-----|
| <b>16S rRNA gene</b>                      | F Primer        | 16SUni-F (900) | TCCTACGGGAGGCAGCAGT                | 9   |
|                                           | R Primer        | 16SUni-R (900) | GGACTACCAGGGTATCTAATCCTGTT         |     |
|                                           | Probe           | 16SUni-P (250) | 6FAM-CGTATTACCGCGGCTGCTGGCAC-TAMRA |     |
| <b><i>Legionella pneumophila</i></b>      | F Primer        | LmipF:         | AAAGGCATGCAAGACGCTATG              | 17  |
|                                           | R Primer        | LmipR:         | GAAACTTGTTAAGAACGTCTTTCATTG        |     |
|                                           | Probe           | Probe:         | FAM-TGGCGCTCAATTGGCTTTAACCGA-TAMRA |     |
| <b><i>Mycobacterium avium</i> complex</b> | F Primer        | MACF           | CCCTGAGACAACACTCGGTC               | 18  |
|                                           | R Primer        | MACR           | ATTACACATTTGATGAACGC               |     |
| <b><i>Acanthamoeba</i> spp.</b>           | F Primer        | AcantF900      | CCCAGATCGTTTACCGTGAA               | 19  |
|                                           | R Primer        | AcantR1100     | TAAATATTAATGCCCCCAACTATCC          |     |
| <b><i>bla<sub>TEM</sub></i></b>           | F Primer        | bla-TEM, FX    | GCKGCCAACTTACTTCTGACAACG           | 20  |
|                                           | R Primer        | bla-TEM, RX    | CTTTATCCGCCTCCATCCAGTCTA           |     |
| <b><i>sul1</i></b>                        | F Primer        | sul1-FW        | CGCACCGGAAACATCGCTGCAC             | 20  |
|                                           | R Primer        | sul1-RV        | TGAAGTTCCGCCGCAAGGCTCG             |     |

**Table S9:** Reaction mixes and thermal cycling conditions for qPCR assays.

| Gene Target                               | Ref | Reaction Mix              | Reaction Conc. (μM) | Reaction Cycling                                                 | Temp (°C) | Time (sec) |
|-------------------------------------------|-----|---------------------------|---------------------|------------------------------------------------------------------|-----------|------------|
| <b>16S rRNA gene</b>                      | 9   | TaqMan™ Environmental 2.0 | (1x)                | Pre-denaturation for 95C for 10 min                              |           |            |
|                                           |     | Primer (F and R)          | 0.9                 | Denaturation                                                     | 95        | 15 s       |
|                                           |     | Probe                     | 0.25                | Annealing                                                        | 60        | 30 s       |
|                                           |     | Bovine serum albumen      | 0.05                | Extension                                                        | 72        | 60 s       |
| <b><i>Legionella pneumophila</i></b>      | 17  | TaqMan Environmental 2.0  | (1x)                | Pre-denaturation for 95C for 10 min                              |           |            |
|                                           |     | Primer (F and R)          | 0.9                 | Denaturation                                                     | 95        | 15 s       |
|                                           |     | Probe                     | 0.25                | Annealing                                                        | 60        | 60 s       |
|                                           |     | Bovine serum albumen      | 0.05                |                                                                  |           |            |
| <b><i>Mycobacterium avium</i> complex</b> | 18  | PowerUp SYBR Green        | (1x)                | UDG activation for 2 min +<br>Pre-denaturation for 95C for 5 min |           |            |
|                                           |     | Primer (F and R)          | 0.35                | Denaturation                                                     | 95        | 15 s       |
|                                           |     | Probe                     | NA                  | Annealing                                                        | 55        | 30 s       |
|                                           |     | Bovine serum albumen      | 0.05                | Extension                                                        | 72        | 60 s       |
| <b><i>Acanthamoeba</i> spp.</b>           | 19  | PowerUp SYBR Green        | (1x)                | UDG activation for 2 min +<br>Pre-denaturation for 95C for 1 min |           |            |
|                                           |     | Primer (F and R)          | 0.25                | Denaturation                                                     | 95        | 15 s       |
|                                           |     | Probe                     | NA                  | Annealing                                                        | 60        | 60 s       |
|                                           |     | Bovine serum albumen      | 0.05                | Extension                                                        | 72        | 60 s       |
| <b><i>blaTEM</i></b>                      | 20  | PowerUp™ SYBR™ Green      | (1x)                | UDG activation for 2 min +<br>Pre-denaturation for 95C for 3 min |           |            |
|                                           |     | Primer (F and R)          | 0.3                 | Denaturation                                                     | 95        | 15 s       |
|                                           |     | Probe                     | NA                  | Annealing                                                        | 60        | 20 s       |
|                                           |     | Bovine serum albumen      | 0.05                | Extension                                                        | 72        | 60 s       |

|                    |    |                      |      |                                                                  |    |      |
|--------------------|----|----------------------|------|------------------------------------------------------------------|----|------|
| <b><i>sul1</i></b> | 20 | PowerUp™ SYBR™ Green | (1x) | UDG activation for 2 min +<br>Pre-denaturation for 95C for 3 min |    |      |
|                    |    | Primer (F and R)     | 0.3  | Denaturation                                                     | 95 | 15 s |
|                    |    | Probe                | NA   | Annealing                                                        | 60 | 30 s |
|                    |    | Bovine serum albumen | 0.05 | Extension                                                        | 72 | 60 s |



**Table S10:** qPCR inhibition testing results. Samples were deemed “not inhibited” when the difference between measured delta(Ct) and expected delta(Ct) (see the right-most column) was less than one. Sample dilutions that meet criteria for “not inhibited” are shaded green in the right column. *Mycobacterium avium* complex is abbreviated as “MAC.” Note that the header rows repeat on each new page.

|                    |                                                             | Expected<br>delta(Ct)<br>between dilution |      |      | Measured Ct at Specified<br>Dilution Factor<br>(x1, 2, 5, 10) |       |       |       | Difference Between<br>Measured<br>delta(Ct) and<br>Expected delta(Ct) |       |       |
|--------------------|-------------------------------------------------------------|-------------------------------------------|------|------|---------------------------------------------------------------|-------|-------|-------|-----------------------------------------------------------------------|-------|-------|
|                    |                                                             | Dilution Factor                           |      |      |                                                               |       |       |       |                                                                       |       |       |
| Assay              | Sample Type                                                 | x2                                        | x5   | x10  | x1                                                            | x2    | x5    | x10   | x2                                                                    | x5    | x10   |
| Acantha-<br>moeba  | Pipe loop fed with 100% conventional feedwater (bulk water) |                                           |      |      |                                                               |       |       |       |                                                                       |       |       |
|                    | Pipe loop fed with t advanced blend (bulk water)            | 1.16                                      |      |      | 31.40                                                         | 32.70 |       |       | 0.14                                                                  |       |       |
|                    | Pipe loop fed with 100% conventional feedwater (biofilm)    |                                           | 1.36 | 2.40 |                                                               | 27.76 | 29.70 | 30.73 |                                                                       | 0.58  | 0.57  |
|                    | Pipe loop fed with t advanced blend (biofilm)               | 1.16                                      |      |      | 31.50                                                         | 32.30 |       |       | -0.36                                                                 |       |       |
|                    | Conventional feedwater                                      |                                           | 1.36 | 2.40 |                                                               | 27.98 | 30.01 | 31.10 |                                                                       | 0.67  | 0.72  |
|                    | Advanced feedwater                                          | 1.03                                      | 2.40 | 3.43 |                                                               |       |       |       |                                                                       |       |       |
| bla <sub>TEM</sub> | Pipe loop fed with 100% conventional feedwater (bulk water) |                                           | 1.54 | 2.71 |                                                               | 28.41 | 30.18 | 32.02 |                                                                       | 0.23  | 0.90  |
|                    | Pipe loop fed with t advanced blend (bulk water)            | 1.04                                      |      |      | 29.58                                                         | 30.78 |       |       | 0.16                                                                  |       |       |
|                    | Pipe loop fed with 100% conventional feedwater (biofilm)    |                                           | 1.54 | 2.71 |                                                               | 28.40 | 30.48 | 31.73 |                                                                       | 0.54  | 0.62  |
|                    | Pipe loop fed with t advanced blend (biofilm)               | 1.04                                      |      |      | 29.63                                                         | 31.05 |       |       | 0.38                                                                  |       |       |
|                    | Conventional feedwater                                      | 1.17                                      | 2.71 | 3.88 |                                                               | 28.51 | 30.44 | 31.49 |                                                                       | -0.78 | -0.90 |
|                    | Advanced feedwater                                          |                                           | 1.54 | 2.71 |                                                               | 28.32 | 30.25 | 31.36 |                                                                       | 0.39  | 0.33  |

|               |                                                             | Expected<br>delta(Ct)<br>between dilution |      |      | Measured Ct at Specified<br>Dilution Factor<br>(x1, 2, 5, 10) |       |       |       | Difference Between<br>Measured<br>delta(Ct) and<br>Expected delta(Ct) |       |       |
|---------------|-------------------------------------------------------------|-------------------------------------------|------|------|---------------------------------------------------------------|-------|-------|-------|-----------------------------------------------------------------------|-------|-------|
|               |                                                             | Dilution Factor                           |      |      |                                                               |       |       |       |                                                                       |       |       |
| Assay         | Sample Type                                                 | x2                                        | x5   | x10  | x1                                                            | x2    | x5    | x10   | x2                                                                    | x5    | x10   |
| MAC           | Pipe loop fed with 100% conventional feedwater (bulk water) |                                           | 1.50 | 2.64 |                                                               | 24.56 | 26.45 | 27.70 |                                                                       | 0.39  | 0.50  |
|               | Pipe loop fed with t advanced blend (bulk water)            | 1.10                                      |      |      | 30.81                                                         | 31.77 |       |       | -0.14                                                                 |       |       |
|               | Pipe loop fed with 100% conventional feedwater (biofilm)    |                                           | 1.50 | 2.64 |                                                               | 24.50 | 25.95 | 27.00 |                                                                       | -0.05 | -0.14 |
|               | Pipe loop fed with t advanced blend (biofilm)               | 1.10                                      |      |      | 31.03                                                         | 31.82 |       |       | -0.31                                                                 |       |       |
|               | Conventional feedwater                                      |                                           | 1.50 | 2.64 |                                                               | 24.73 | 26.65 | 27.97 |                                                                       | 0.42  | 0.60  |
|               | Advanced feedwater                                          |                                           | 1.50 | 2.64 |                                                               | 24.58 | 26.57 | 27.63 |                                                                       | 0.49  | 0.41  |
|               |                                                             |                                           |      |      |                                                               |       |       |       |                                                                       |       |       |
| sul1          | Pipe loop fed with 100% conventional feedwater (bulk water) | 1.14                                      | 2.65 | 3.80 | 29.67                                                         | 31.58 | 23.65 |       | 0.77                                                                  |       |       |
|               | Pipe loop fed with t advanced blend (bulk water)            | 1.14                                      | 2.65 | 3.80 | 29.54                                                         | 30.97 | 31.29 | 32.70 | 0.29                                                                  | -0.90 | -0.64 |
|               | Pipe loop fed with 100% conventional feedwater (biofilm)    | 1.14                                      | 2.65 | 3.80 | 28.63                                                         | 29.72 | 31.66 | 32.84 | -0.05                                                                 | 0.38  | 0.41  |
|               | Pipe loop fed with t advanced blend (biofilm)               | 1.14                                      | 2.65 | 3.80 | 30.40                                                         | 31.90 |       |       | 0.36                                                                  |       |       |
|               | Conventional feedwater                                      | 1.14                                      | 2.65 | 3.80 | 29.72                                                         | 31.50 | 33.90 |       | 0.64                                                                  | 1.53  |       |
|               | Advanced feedwater                                          | 1.14                                      | 2.65 | 3.80 | 19.73                                                         | 20.74 | 22.58 | 23.65 | -0.13                                                                 | 0.20  | 0.12  |
|               |                                                             |                                           |      |      |                                                               |       |       |       |                                                                       |       |       |
| 16S rRNA Gene | Pipe loop fed with 100% conventional feedwater (bulk water) | 1.12                                      | 2.61 | 3.73 | 21.98                                                         | 22.75 | 24.06 | 25.14 | -0.35                                                                 | -1.30 | -2.65 |

|            |                                                                         | Expected<br>delta(Ct)<br>between dilution |      |      | Measured Ct at Specified<br>Dilution Factor<br>(x1, 2, 5, 10) |       |       |       | Difference Between<br>Measured<br>delta(Ct) and<br>Expected delta(Ct) |       |       |
|------------|-------------------------------------------------------------------------|-------------------------------------------|------|------|---------------------------------------------------------------|-------|-------|-------|-----------------------------------------------------------------------|-------|-------|
|            |                                                                         | Dilution Factor                           |      |      |                                                               |       |       |       |                                                                       |       |       |
| Assay      | Sample Type                                                             | x2                                        | x5   | x10  | x1                                                            | x2    | x5    | x10   | x2                                                                    | x5    | x10   |
|            | Pipe loop fed with t<br>advanced blend<br>(bulk water)                  | 1.12                                      | 2.61 | 3.73 | 21.38                                                         | 22.40 | 23.64 | 24.70 | -0.10                                                                 | -1.37 | -2.67 |
|            | Pipe loop fed with<br>100%<br>conventional<br>feedwater<br>(biofilm)    | 1.12                                      | 2.61 | 3.73 | 21.22                                                         | 21.73 | 24.80 | 26.00 | -0.61                                                                 | 0.46  | -2.53 |
|            | Pipe loop fed with t<br>advanced blend<br>(biofilm)                     | 1.12                                      | 2.61 | 3.73 | 20.73                                                         | 21.73 | 23.05 | 24.21 | -0.12                                                                 | -1.29 | -2.57 |
|            | Full-scale<br>distribution<br>system                                    | 1.12                                      | 2.61 | 3.73 | 20.00                                                         | 21.01 | 22.42 | 23.56 | -0.11                                                                 | -1.20 | -2.59 |
|            | Advanced<br>feedwater                                                   | 1.12                                      | 2.61 | 3.73 | 16.91                                                         | 17.85 | 19.08 | 20.24 | -0.18                                                                 | -1.38 | -2.57 |
| Legionella | Pipe loop fed with<br>100%<br>conventional<br>feedwater<br>(bulk water) |                                           | 1.56 | 2.75 |                                                               | 29.53 | 31.50 | 32.80 |                                                                       | 0.41  | 0.52  |
|            | Pipe loop fed with t<br>advanced blend<br>(bulk water)                  | 1.04                                      |      |      | 32.56                                                         | 33.56 |       |       | -0.04                                                                 |       |       |
|            | Pipe loop fed with<br>100%<br>conventional<br>feedwater<br>(biofilm)    |                                           | 1.56 | 2.75 |                                                               | 29.53 | 31.50 | 32.80 |                                                                       | 0.41  | 0.52  |
|            | Pipe loop fed with t<br>advanced blend<br>(biofilm)                     | 1.04                                      |      |      | 32.50                                                         | 33.51 |       |       | -0.03                                                                 |       |       |
|            | Conventional<br>feedwater                                               |                                           | 1.56 | 2.75 |                                                               | 29.53 | 31.50 | 32.80 |                                                                       | 0.41  | 0.52  |
|            | Advanced<br>feedwater                                                   |                                           | 1.56 | 2.75 |                                                               | 29.53 | 31.50 | 32.80 |                                                                       | 0.41  | 0.52  |
|            |                                                                         |                                           |      |      |                                                               |       |       |       |                                                                       |       |       |

**Table S11:** The RO permeate used in the study was from an advanced treatment facility at a different location than the pipe loops, and batch growth assays under carbon-limiting conditions were used to determine if carbon was introduced during RO handling. A grab sample was collected at each step of RO permeate handling, including conveyance, transportation, and storage (“Sample Location”). The total cell count at the start of the assay (“Start”) was compared to that after 5 days of incubation (“End”). The absolute increase and the fold increase in cells are shown throughout RO handling and also in the experimental control for comparison.

|                                                                                   | Total Cell Counts (cells/mL) |                   |                      |               |
|-----------------------------------------------------------------------------------|------------------------------|-------------------|----------------------|---------------|
| Sample Location                                                                   | Start<br>T = 0 days          | End<br>T = 5 days | Absolute<br>Increase | Fold Increase |
| RO permeate                                                                       | $10^{3.66}$                  | $10^{3.72}$       | $10^{2.79}$          | 1.1           |
| RO permeate storage tank<br>(Onsite at advanced wastewater<br>treatment facility) | $10^{4.14}$                  | $10^{4.74}$       | $10^{4.62}$          | 4.0           |
| RO permeate conveyance<br>(Feedline to truck)                                     | $10^{4.40}$                  | $10^{4.71}$       | $10^{4.40}$          | 2.0           |
| Truck effluent                                                                    | $10^{4.49}$                  | $10^{5.43}$       | $10^{5.38}$          | 8.8           |
| Stored, conditioned<br>RO permeate                                                | $10^{5.49}$                  | $10^{5.63}$       | $10^{5.09}$          | 1.4           |
| Experimental control<br>(Bottled mineral Evian water)                             | $10^{4.94}$                  | $10^{5.01}$       | $10^{4.17}$          | 1.2           |

## Supplementary Figures

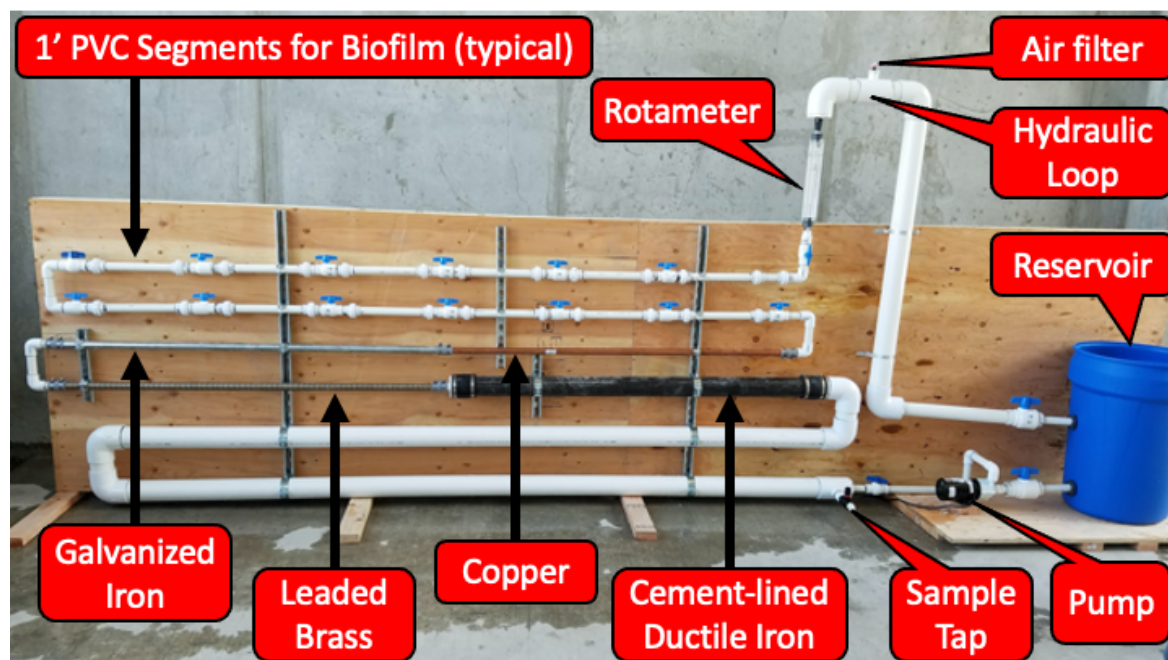

**Figure S1:** A constructed pipe loop rig with components labeled. Unlabeled piping is made of PVC. The reservoir was covered with a lid during operation (not shown).

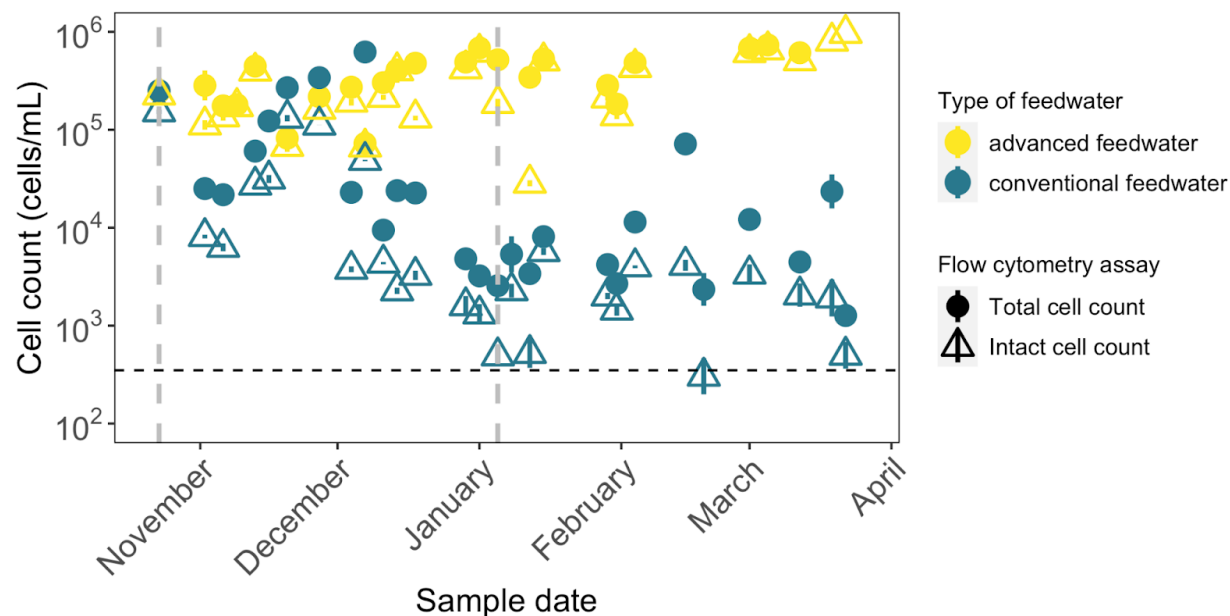

**Figure S2:** Total and intact cell counts by flow cytometry in the conditioned RO permeate and conventional feedwater over the study period. The horizontal dashed line represents the geometric mean total cell count in RO permeate ( $\sim 350$  cells/mL). The vertical gray dashed lines denote phase changes (from left-to-right: inoculation  $\rightarrow$  Phase 1  $\rightarrow$  Phase 2). Error bars indicate geometric standard deviation of technical triplicates; the absence of an error bar indicates that error is smaller than the marker.

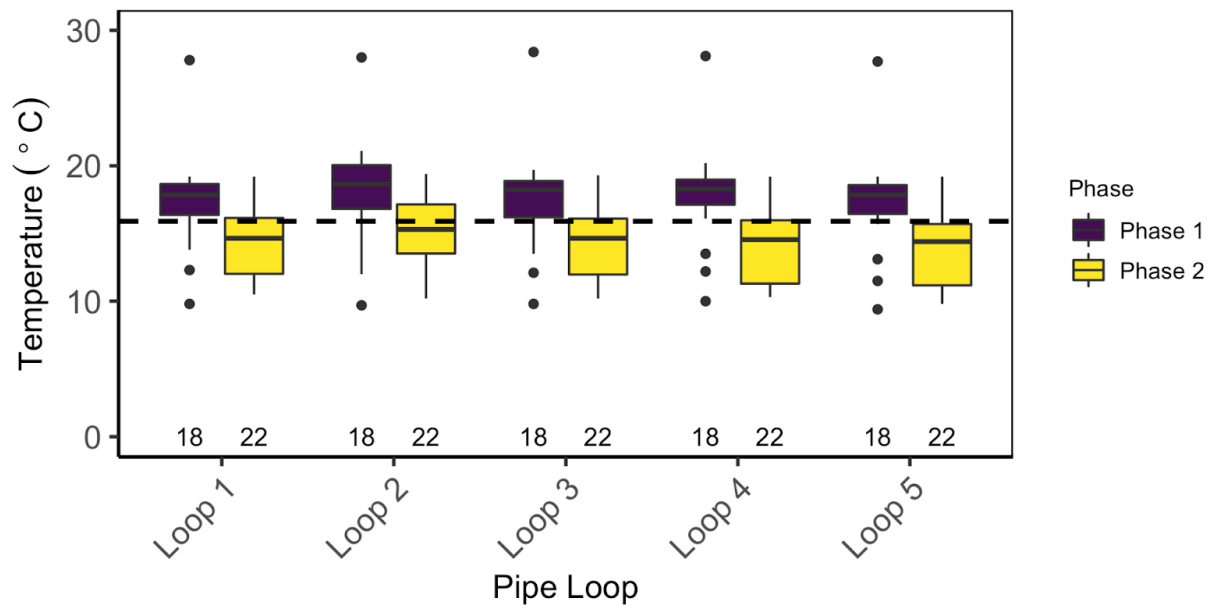

**Figure S3:** Boxplot of temperature in the pipe loops at the end of each recirculation period by study phase. Horizontal dashed line denotes the mean temperature of the pipe loops (15.9 °C) for all phases. The total number of samples taken for each sample group is located immediately above the x-axis.

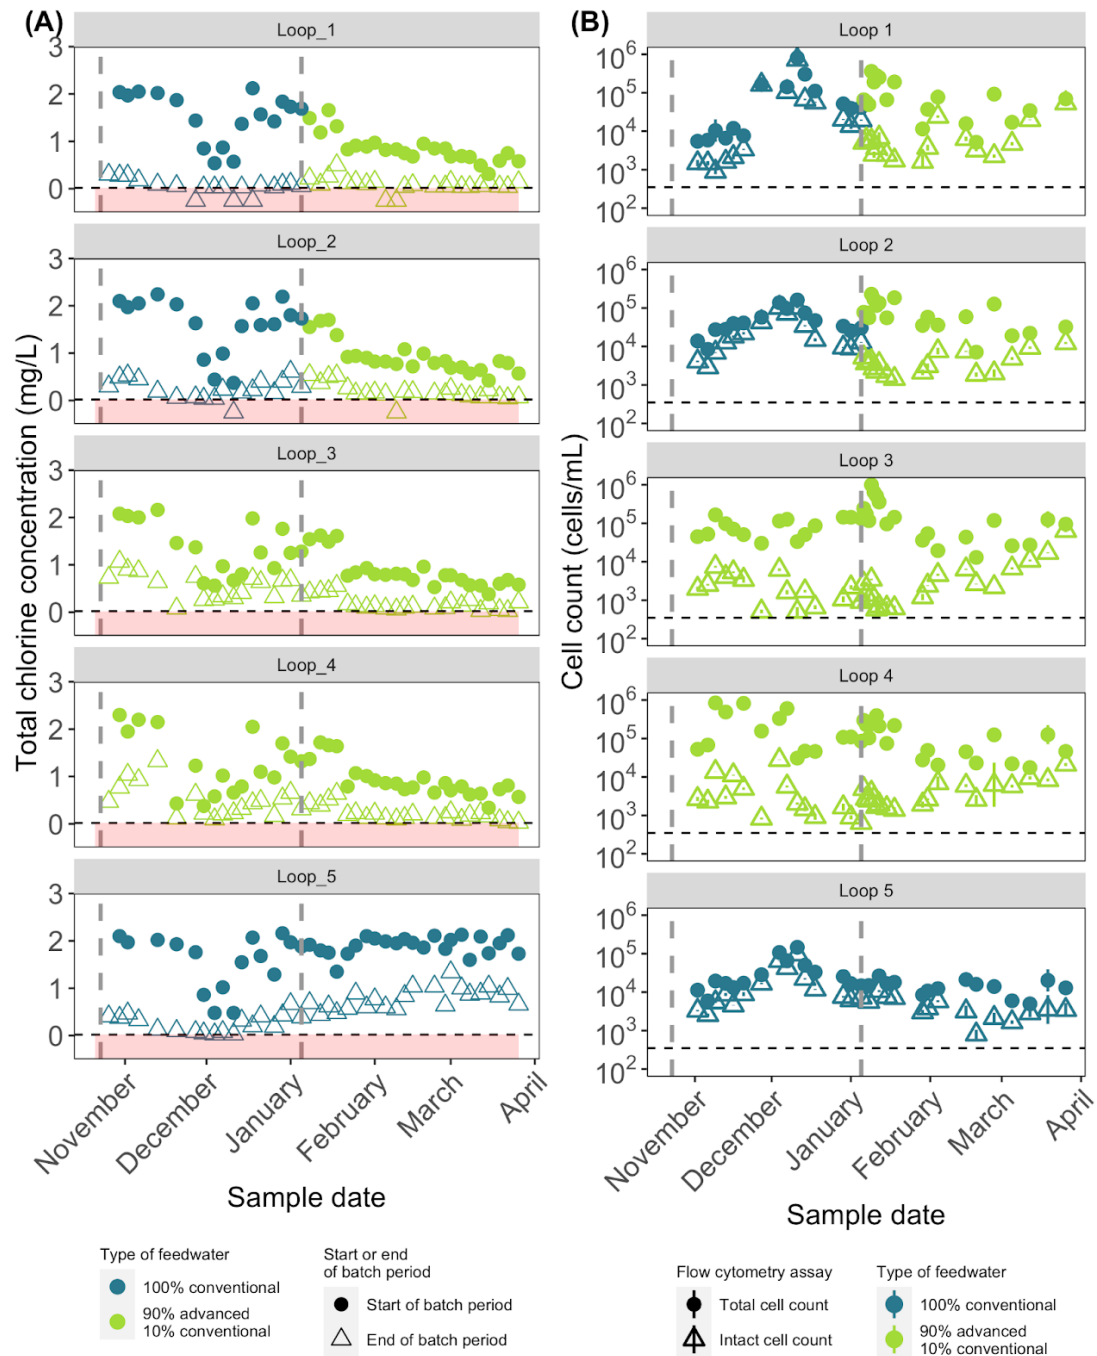

**Figure S4:** (A) Total chlorine concentration in the pipe loops at the start and end of recirculation periods, where the red area (lightly shaded) below the horizontal dashed line illustrates <0.02 mg/L of total chlorine, and total chlorine values that were <0.02 mg/L are plotted below the dashed line for visualization. The decrease in chlorine concentration (particularly in loops 1, 2, and 5) in late November/ early December are from a short term recirculation protocol to decrease chlorine concentration of the conventional feedwater. (B) Total and intact cell counts by flow cytometry in the pipe loops over the study period. The horizontal dashed line represents the geometric mean total cell count in RO permeate



(~350 cells/mL). The vertical gray dashed lines denote phase changes (from left-to-right: inoculation → Phase 1 → Phase 2). Time series from individual pipe loop experimental replicates are shown including the transition loops (“Loop 1” and “Loop 2”), the advanced blend loops (“Loop 3” and “Loop 4”) and the conventional control loop (“Loop 5”).

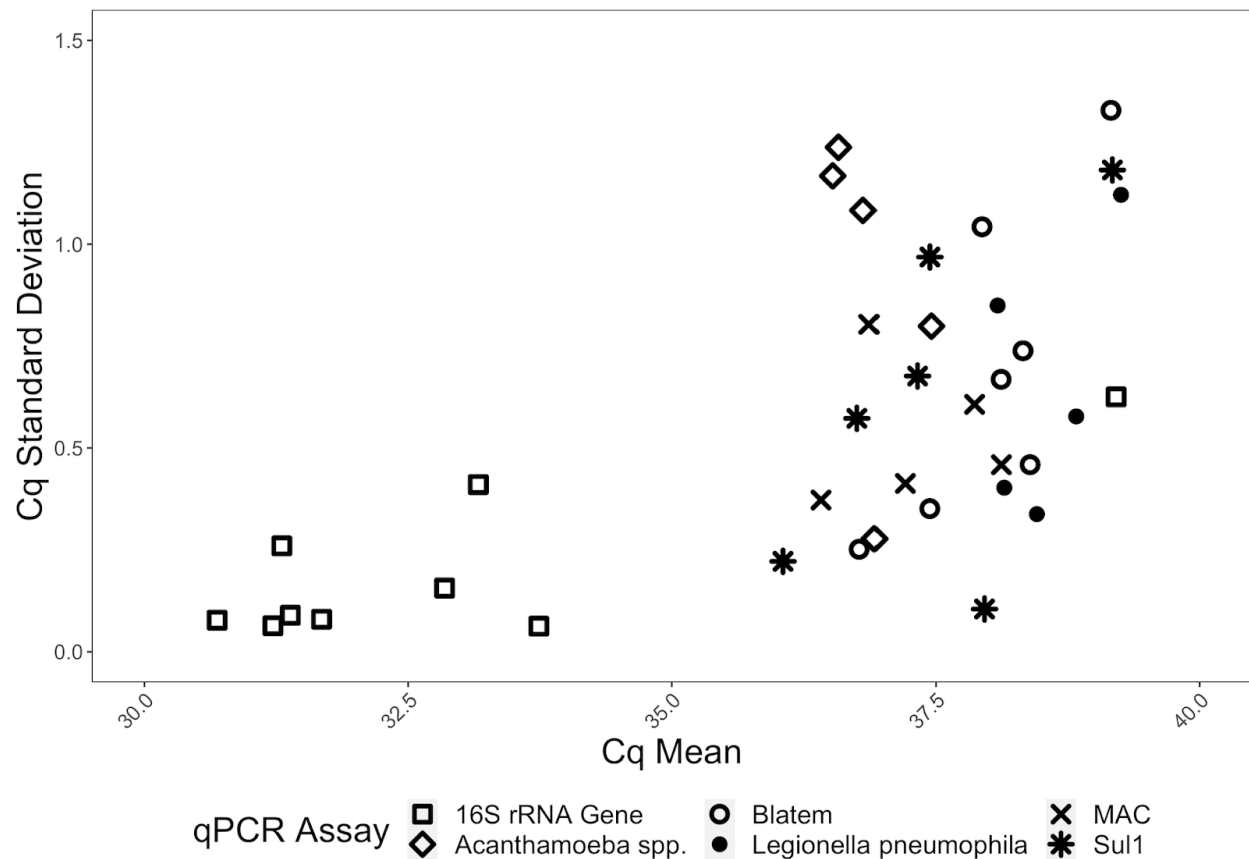

**Figure S5:** Cq Mean versus standard deviation for standard curve replicates at the respective standard curve LoQ (i.e., 1,000 gene copies per well for the 16S rRNA gene, and 10 gene copies per well for all other qPCR assays).

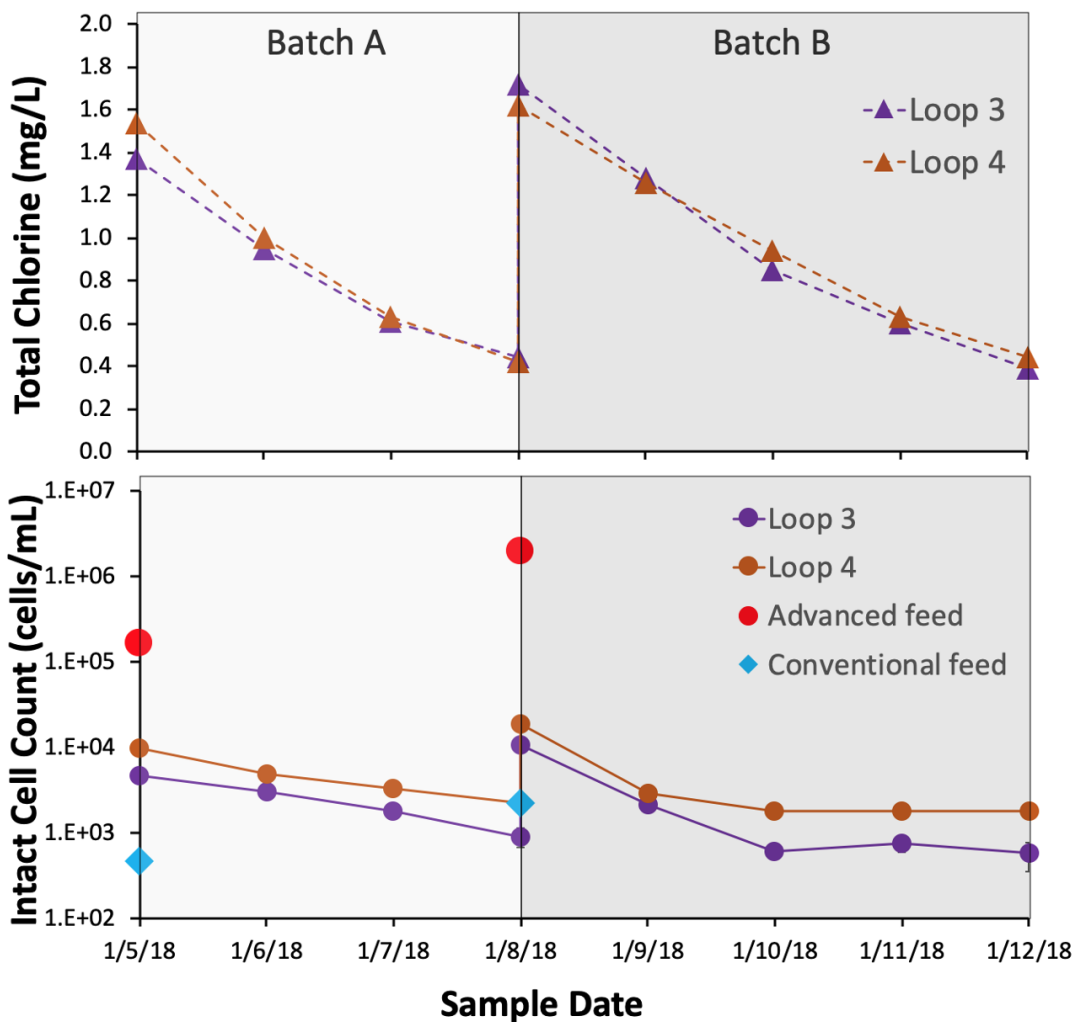

**Figure S6:** Total chlorine concentration and intact cell counts in feed waters and in the advanced blend loops (Loops 3 & 4) over the first two recirculation periods of Phase 2. Error bars indicate geometric standard deviation of technical triplicates; the absence of error bars indicates that error is smaller than the marker.

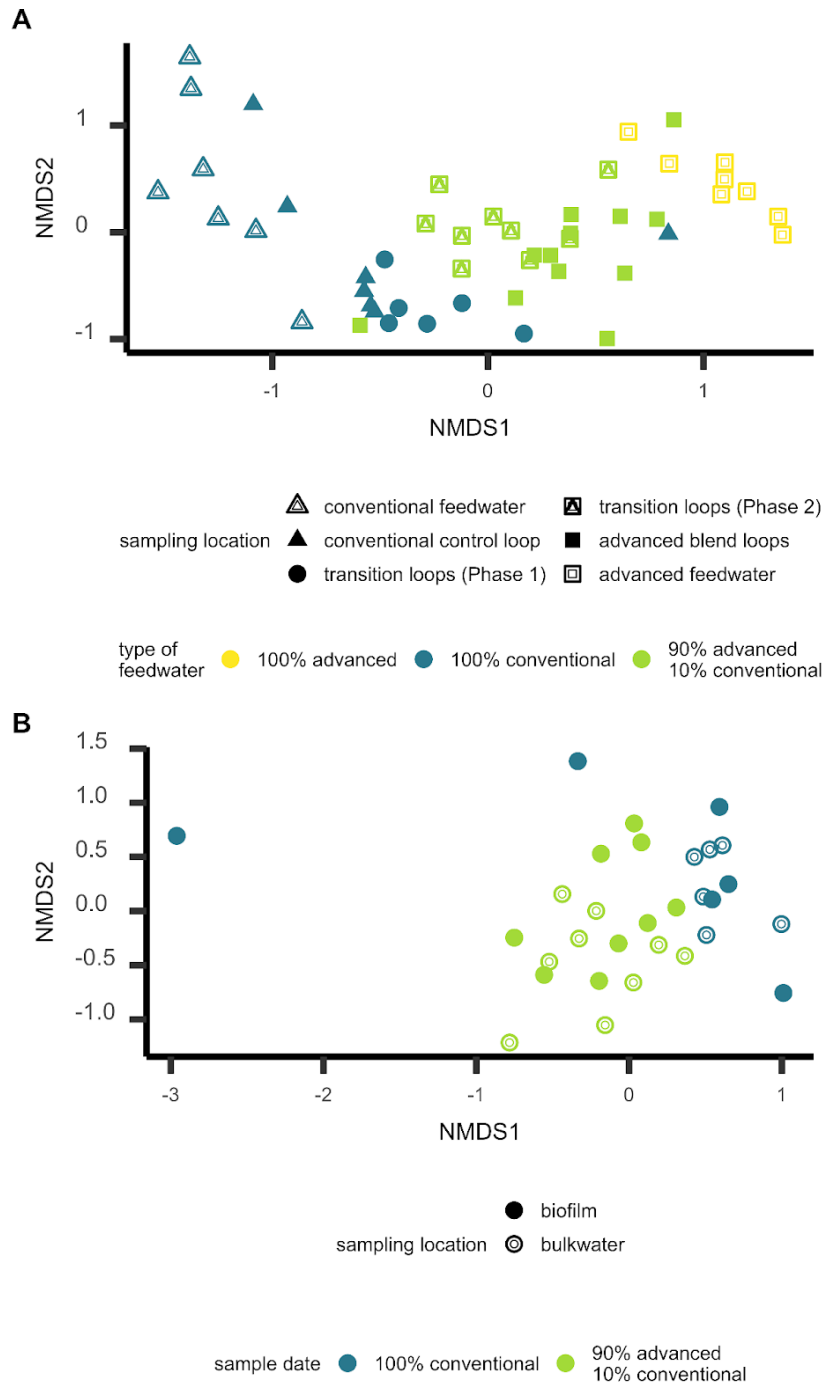

**Figure S7:** Non-metric multidimensional scaling of Bray-Curtis dissimilarity for (A) pipe loop bulk water microbial communities via 16S rRNA gene sequencing (stress= 0.15) and (B) bulk water and biofilm samples from transition loop samples (stress= 0.18)



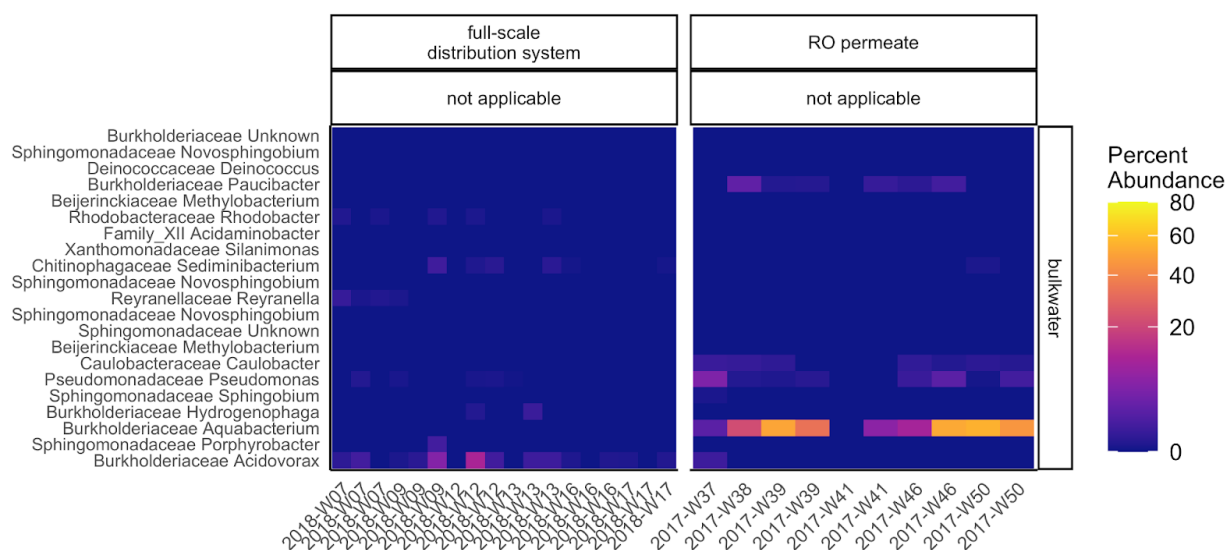

**Figure S9:** Heatmap of percent abundance (see scale on the right of the figure) of ASVs identified to significantly change in the transition loops in Phase 2 (rows) across sampling dates (columns - in the format yyyy-Wzz, yyyy is the year, and zz is a number from 01-52 that indicates which week of the year the sample was collected)



## References

- 1I. B. Gomes, M. Simões and L. C. Simões, An overview on the reactors to study drinking water biofilms, *Water Res.*, 2014, **62 IS-**, 63–87.
- 2L. C. Kennedy, S. E. Miller, R. S. Kantor and K. L. Nelson, Effect of disinfectant residual, pH, and temperature on microbial abundance in disinfected drinking water distribution systems, *Environ. Sci. Water Res. Technol.*, 2021, **7**, 78–92.
- 3E. Gatza, F. Hammes and E. Prest, Assessing water quality with the BD Accuri™ C6 flow cytometer, *White Pap. BD Biosci.*
- 4G. Widmer and K. Jellison, Assessing Performance of Biofilm Sampling Approaches, *Water Res. Found.*, 2015, **49**, 12628–12640.
- 5Y. Cao, J. F. Griffith, S. Dorevitch and S. B. Weisberg, Effectiveness of qPCR permutations, internal controls and dilution as means for minimizing the impact of inhibition while measuring *Enterococcus* in environmental waters, *J. Appl. Microbiol.*, 2012, **113**, 66–75.
- 6F. Hammes, M. Berney, Y. Wang, M. Vital, O. Köster and T. Egli, Flow-cytometric total bacterial cell counts as a descriptive microbiological parameter for drinking water treatment processes, *Water Res.*, 2008, **42**, 269–277.
- 7H. R. Safford and H. N. Bischel, Flow cytometry applications in water treatment, distribution, and reuse: A review, *Water Res.*, 2019, **151**, 110–133.
- 8F. Hammes, F. Goldschmidt, M. Vital, Y. Wang and T. Egli, Measurement and interpretation of microbial adenosine tri-phosphate (ATP) in aquatic environments, *Water Res.*, 2010, **44**, 3915–3923.
- 9S. S. Silkie and K. L. Nelson, Concentrations of host-specific and generic fecal markers measured by quantitative PCR in raw sewage and fresh animal feces, *Water Res.*, 2009, **43**, 4860–4871.
- 10 J. O. Falkinham, A. Pruden and M. Edwards, Opportunistic Premise Plumbing Pathogens: Increasingly Important Pathogens in Drinking Water, *Pathogens*, 2015, **4**, 373–386.
- 11 N. J. Ashbolt, Environmental (Saprozoic) Pathogens of Engineered Water Systems: Understanding Their Ecology for Risk Assessment and Management, *Pathogens*, 2015, **4**, 390–405.
- 12 Briefing note,  
<https://www.who.int/publications-detail-redirect/briefing-note-antimicrobial-reistance-an-emerging-water-sanitation-and-hygiene-issue>, (accessed 6 July 2022).
- 13 C. Narciso-da-Rocha, A. R. Varela, T. Schwartz, O. C. Nunes and C. M. Manaia, blaTEM and vanA as indicator genes of antibiotic resistance contamination in a hospital–urban wastewater treatment plant system, *J. Glob. Antimicrob. Resist.*, 2014, **2**, 309–315.
- 14 C. X. Hiller, U. Hübner, S. Fajnorova, T. Schwartz and J. E. Drewes, Antibiotic microbial resistance (AMR) removal efficiencies by conventional and advanced wastewater treatment processes: A review, *Sci. Total Environ.*, 2019, **685**, 596–608.
- 15 R. S. Kantor, S. E. Miller and K. L. Nelson, The Water Microbiome Through a Pilot Scale Advanced Treatment Facility for Direct Potable Reuse, *Front. Microbiol.*, 2019, **10**, 21.
- 16 Q. M. Bautista-de los Santos, J. L. Schroeder, M. C. Sevillano-Rivera, R. Sungthong, U. Z. Ijaz, W. T. Sloan and A. J. Pinto, Emerging investigators series:

- microbial communities in full-scale drinking water distribution systems – a meta-analysis, *Env. Sci Water Res Technol*, 2016, **2**, 631–644.
- 17 E. J. Nazarian, D. J. Bopp, A. Saylor, R. J. Limberger and K. A. Musser, Design and implementation of a protocol for the detection of *Legionella* in clinical and environmental samples, *Diagn. Microbiol. Infect. Dis.*, 2008, **62**, 125–132.
- 18 H. Whiley, A. Keegan, H. Fallowfield and R. Bentham, Detection of *Legionella*, *L. pneumophila* and *Mycobacterium Avium* Complex (MAC) along Potable Water Distribution Pipelines, *Int. J. Environ. Res. Public Health*, 2014, **11**, 7393–7405.
- 19 P. H. Dobrowsky, S. Khan and W. Khan, Resistance of *Legionella* and *Acanthamoeba mauritaniensis* to heat treatment as determined by relative and quantitative polymerase chain reactions, *Environ. Res.*, 2017, **158**, 82–93.
- 20 L. Proia, A. Anzil, J. Subirats, C. Borrego, M. Farrè, M. Llorca, J. L. Balcázar and P. Servais, Antibiotic resistance along an urban river impacted by treated wastewaters, *Sci. Total Environ.*, 2018, **628–629**, 453–466.
